# Supplementary material
Source: PubMed Central journal article supplement (PMC9063199)
Supplement: Supp_FigS2.pdf [file Supp_FigS2.pdf]

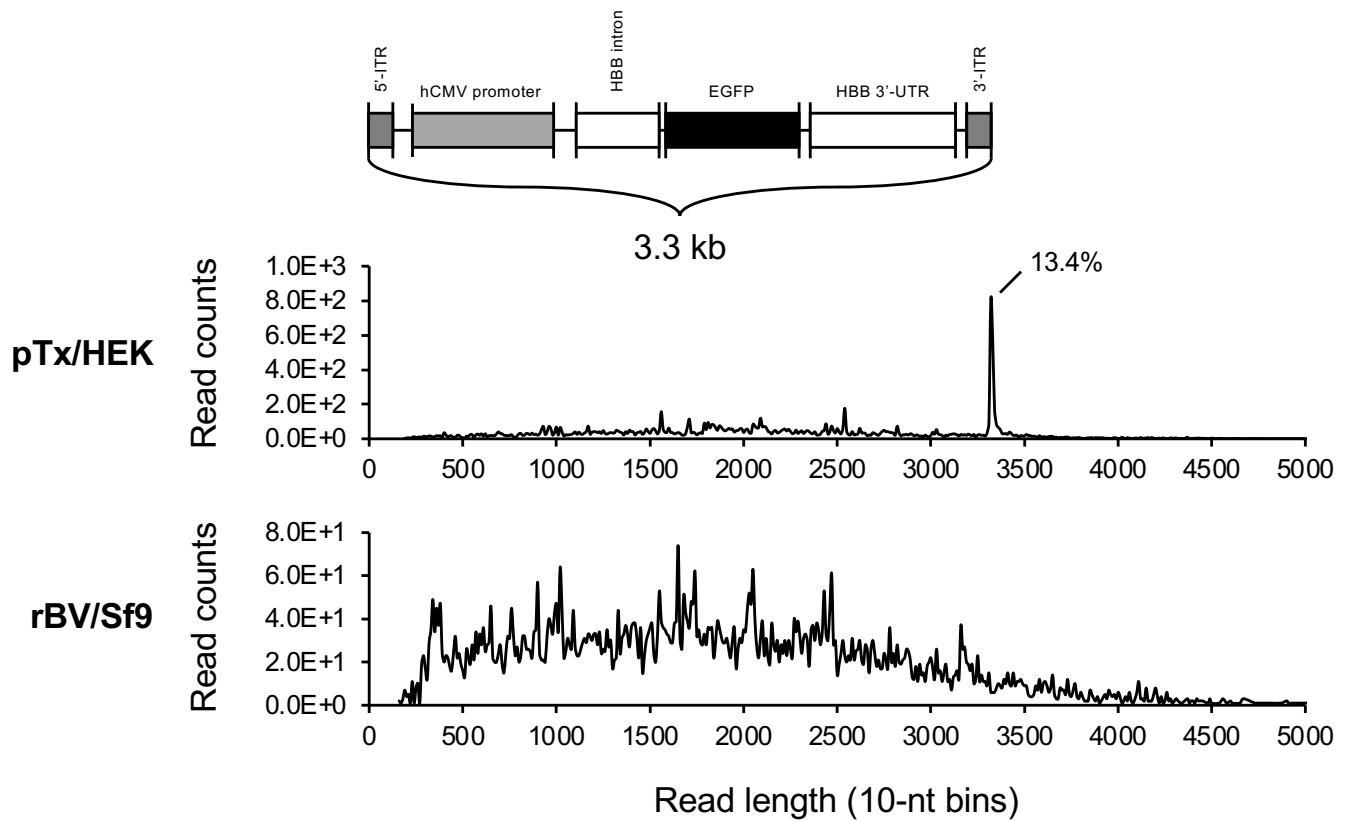

**Supplemental Figure 2. Read length profiles of on vectors produced by pTx/HEK293 and rBV/Sf9 platforms.** The lengths of reads mapping to the vector reference were counted and binned into 10-nt intervals and plotted. Read count values are not normalized to a  $\lambda$ DNA spike-in to control for size bias.
