# Supplementary material
Source: PubMed Central journal article supplement (PMC9063199)
Supplement: Supp_FigS3.pdf [file Supp_FigS3.pdf]

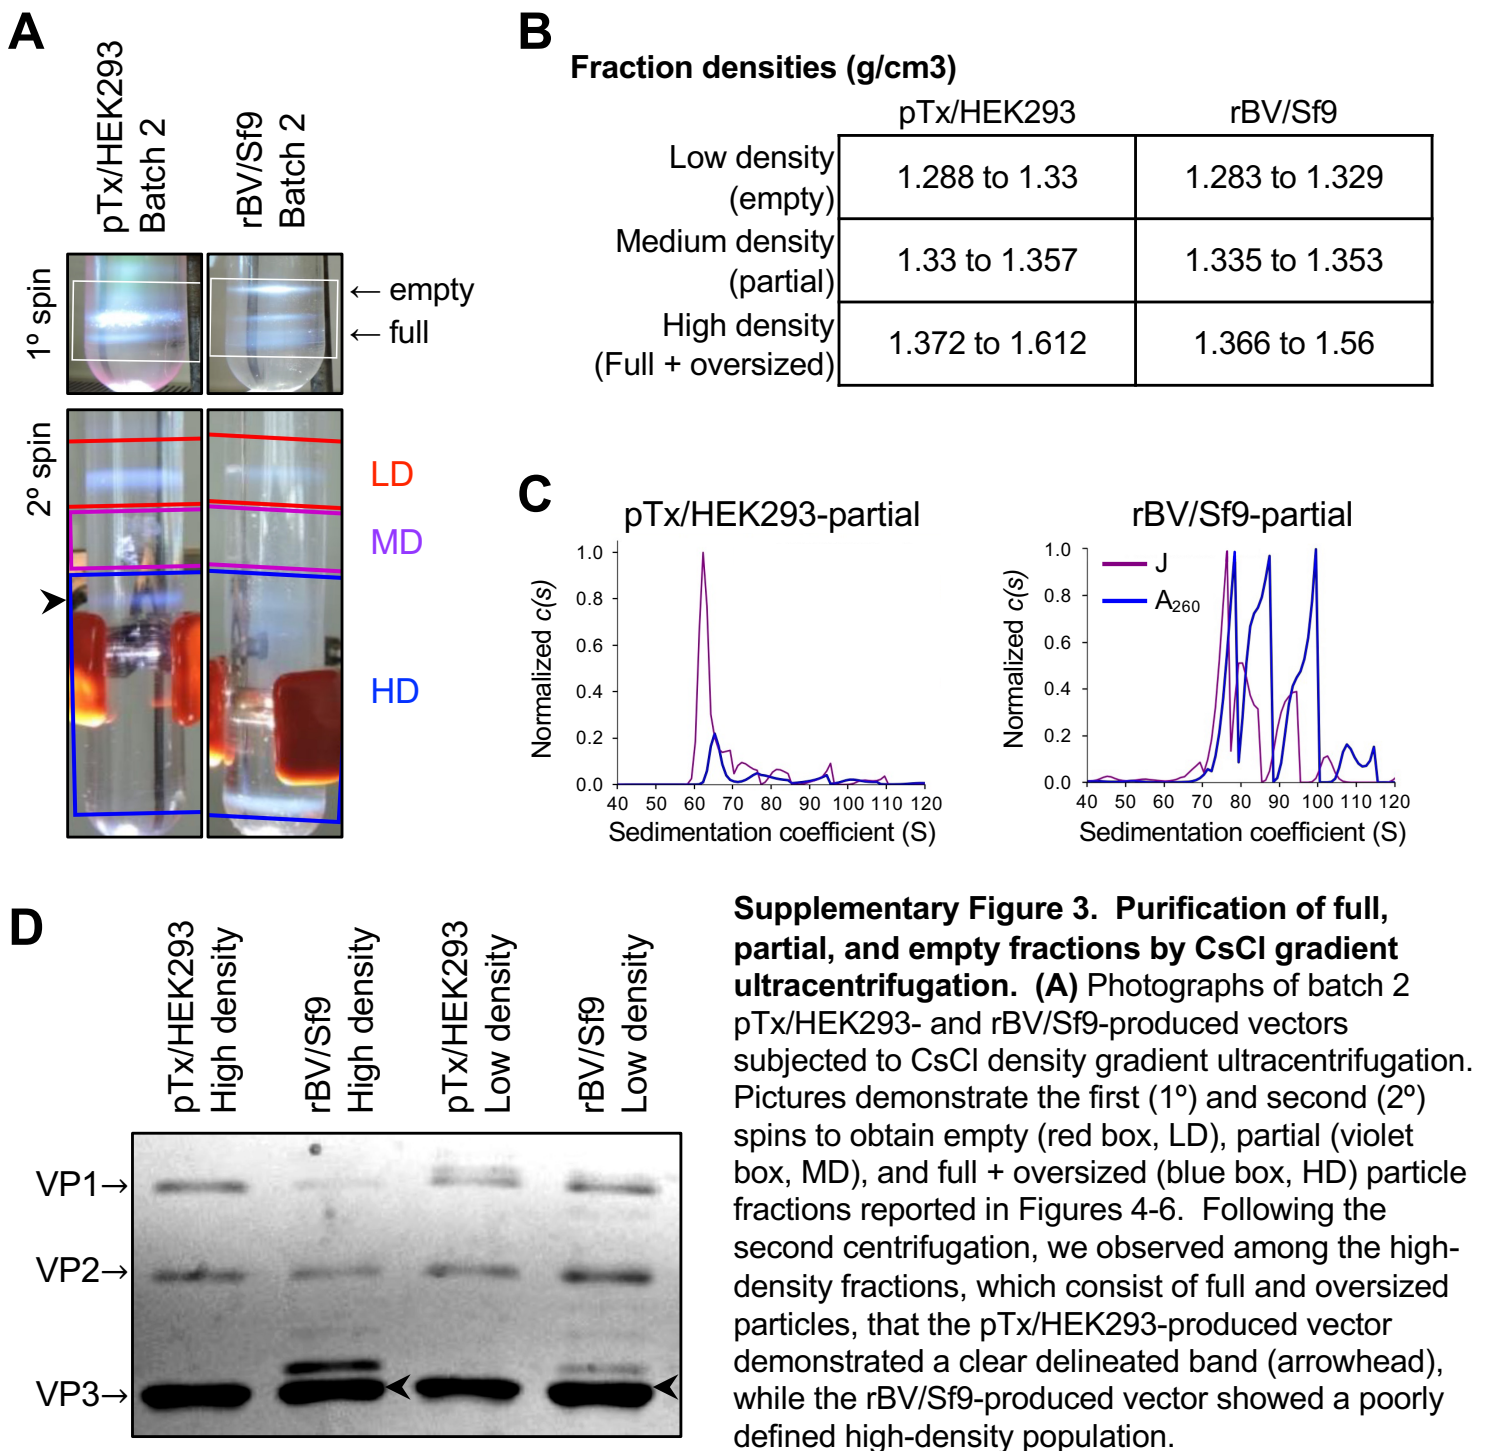

(B) Table to summarize the densities for the three fractions. (C) Analytical ultracentrifugation analyses of pTx/HEK293- and rBV/Sf9-produced vectors. Blue and purple signals respectively correspond to the sedimentation profile obtained by absorbance at 260 nm ( $A_{260}$ ) and interference fringe shift (J). The x axis is the sedimentation coefficient (S). The y axis is the normalized distribution  $c(s)$ . The fringe shift signal was used to determine the percentage of the different types of capsids. (D) Silver stained PAGE gel of isolated full and empty vector fractions. Protein bands attributed to VP1, VP2, and VP3 are annotated. The high- and low-density fractions of the pTx/HEK293- and rBV/Sf9-produced vectors displayed the approximate and expected 1:1:10 ratio of VP1:VP2:VP3 capsids.<sup>1</sup> Notably, the rBV/Sf9-produced vectors showed minor baculoviral cathepsin-cleaved VP1/2 bands.<sup>2,3</sup> Silver staining of capsids for the partial fractions were similar to full and empty fractions (unpublished observations).

1. Wang, D, Tai, PWL, and Gao, G (2019). Adeno-associated virus vector as a platform for gene therapy delivery. *Nat Rev Drug Discov* **18**: 358-378.
2. Galibert, L, Savy, A, Dickx, Y, Bonnin, D, Bertin, B, Mushimiyimana, I, *et al.* (2018). Origins of truncated supplementary capsid proteins in rAAV8 vectors produced with the baculovirus system. *PLoS One* **13**: e0207414.
3. Cecchini, S, Virag, T, and Kotin, RM (2011). Reproducible high yields of recombinant adeno-associated virus produced using invertebrate cells in 0.02- to 200-liter cultures. *Hum Gene Ther* **22**: 1021-1030.
