# Supplementary material
Source: PubMed Central journal article supplement (PMC9063199)
Supplement: Supp_TableS1.pdf [file Supp_TableS1.pdf]

**Supplemental Table 1. Summary of vector sample quantifications by qPCR, ELISA, and analytical ultracentrifugation**

|         | Vector sample      | Purification process       | vg/mL<br>(ITR2free qPCR) | p/mL<br>(ELISA) | % vg per capsid<br>(qPCR/ELISA) | AUC<br>% empty | AUC<br>% partial | AUC<br>% full | AUC<br>% HMW |
|---------|--------------------|----------------------------|--------------------------|-----------------|---------------------------------|----------------|------------------|---------------|--------------|
| Batch 1 | pTx/HEK293         | IA                         | 7.7E+12                  | 8.0E+12         | 96.3%                           | 9.1            | 18.2             | 50.0          | 22.7         |
|         | rBV/Sf9            | IA                         | 3.2E+13                  | 1.7E+14         | 18.8%                           | 41.1           | 32.8             | 24.7          | 1.4          |
| Batch 2 | pTx/HEK293-full    | CsCl (full fraction)       | 2.1E+13                  | 2.1E+13         | 100.0%                          | nd             | nd               | nd            | nd           |
|         | pTx/HEK293-partial | CsCl (partial fraction)    | 3.9E+12                  | 1.6E+13         | 24.4%                           | 52.8           | 43.9             | 0             | 3.3          |
|         | pTx/HEK293-empty   | CsCl (empty fraction)      | 7.1E+10                  | 5.0E+13         | 0.1%                            | nd             | nd               | nd            | nd           |
|         | rBV/Sf9-full       | IA+CsCl (full fraction)    | 1.1E+13                  | 2.6E+13         | 42.3%                           | nd             | nd               | nd            | nd           |
|         | rBV/Sf9-partial    | IA+CsCl (partial fraction) | 7.1E+12                  | 1.1E+13         | 64.5%                           | 1.1            | 92.3             | 4.7           | 1.9          |
|         | rBV/Sf9-empty      | IA+CsCl (empty fraction)   | 2.5E+11                  | 5.5E+13         | 0.5%                            | nd             | nd               | nd            | nd           |

AUC, analytical ultracentrifugation; CsCl, cesium chloride; ELISA, enzyme-linked immunosorbent assay; HMW, high molecular weight; IA, immunoaffinity; pTx/HEK293, plasmid transfection of human embryonic kidney 293 cells; qPCR, quantitative polymerase chain reaction; rBV/Sf9, recombinant baculovirus with *Spodoptera frugiperda* cells.
